# Supplementary material for: Low-dimensional perovskite nanoplatelet synthesis using in situ photophysical monitoring to establish controlled growth
Source: Royal Society of Chemistry journal article supplement (doi:10.1039/c9nr04010b), 2019-01-01
Supplement: c9nr04010b1.pdf [file c9nr04010b1.pdf]

Electronic Supporting Information

## Low-Dimensional Perovskite Nanoplatelet Synthesis Using *In Situ* Photophysical Monitoring to Establish Controlled Growth

Mai Do,<sup>†</sup> Irene Kim,<sup>‡,++</sup> Matthew A. Kolaczowski,<sup>++†</sup> Jun Kang,<sup>+</sup> Gaurav A. Kamat,<sup>++</sup>  
Zhenghao Yuan,<sup>‡</sup> Nicola S. Barchi,<sup>‡#</sup> Lin-Wang Wang,<sup>+</sup> Yi Liu,<sup>†,++</sup> Matthew J. Jurow,<sup>†,++</sup>  
Carolyn M. Sutter-Fella<sup>‡\*</sup>

<sup>†</sup> The Molecular Foundry, Lawrence Berkeley National Laboratory, Berkeley, CA 94720, United States

<sup>‡</sup> Chemical Sciences Division, Lawrence Berkeley National Laboratory, Berkeley, California 94720, United States

<sup>+</sup> Materials Sciences Division, Lawrence Berkeley National Laboratory, Berkeley, California 94720, United States

<sup>++</sup> College of Chemistry, University of California, Berkeley, California 94720, United States

<sup>#</sup> Laboratory of Semiconductor Materials, Ecole Polytechnique Fédérale de Lausanne, CH-1015 Lausanne, Switzerland

## Experimental setup

The *in situ* photoluminescence (PL) setup (Figure S6) includes a 405 nm laser source that passes through the reaction sample, which is heated to a certain temperature in an aluminum heating block on a hot plate. Following the laser source, there is a laser line filter to reduce the spectral noise. A focus lens ( $F = 50.0$  mm) is placed after the laser line filter. Then, a blocking edge long-pass filter (409 nm) is attached to remove scattered light from the excitation source. A second lens ( $F = 25.4$  mm) is placed to focus the light onto the detector unit and relay the information through the optical fiber to the QE *Pro* spectrometer (*Ocean Optics*), which provides intensity and corresponding wavelength data taken every 10 milliseconds in the Oceanview computer software. With the aid of the magnetic stirring bar, it takes a few microseconds for the injected benzoyl bromide to distribute to that particular level of the solution that is excited by the laser source.

## Supporting results

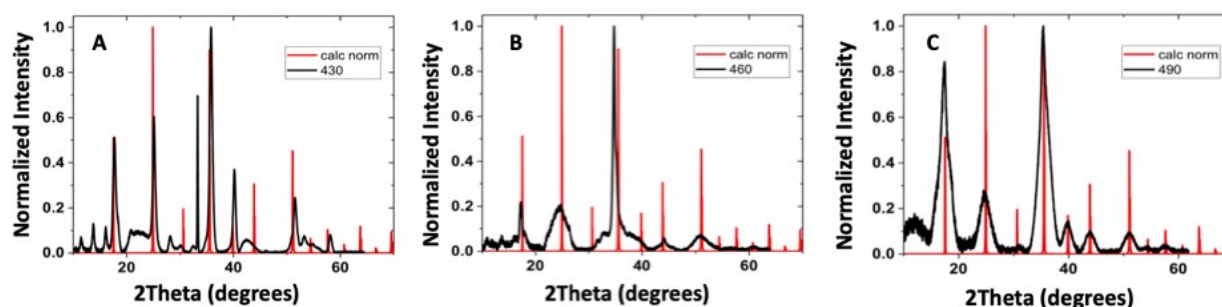

**Figure S1.** XRD patterns of (a) 2 unit cell, (b) 4 unit cell and (c) 6 unit cell thick CsPbBr<sub>3</sub> NPLs emitting at 430 nm, 460 nm and 490 nm, respectively. PXRD data were acquired using a Bruker AXS D8 Discover GADDS X-Ray Diffractometer equipped with a Vantec-500 area detector and is operated at 35 kV and 40 mA at a wavelength of Co K $\alpha$  (1.79 Å). Ideal diffraction patterns were simulated with vesta software package using the first two spectral lines.

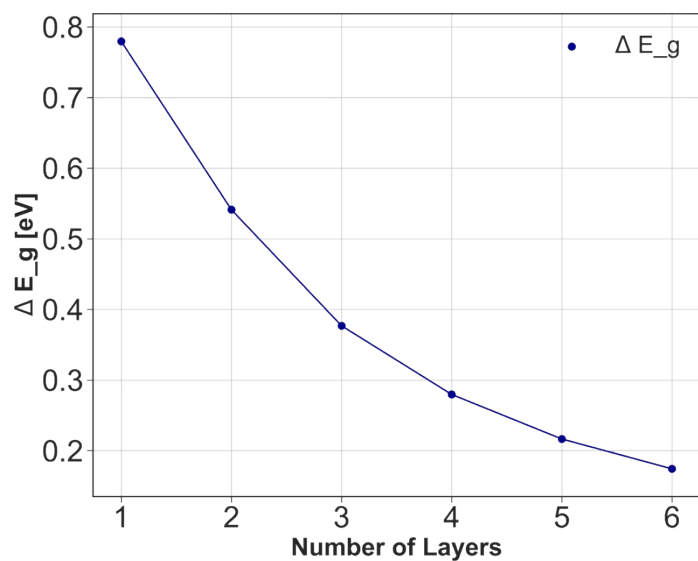

**Figure S2.** Calculated  $\Delta E_g$  for 1-6 layer nanoplates. The observed band gap of bulk  $\text{CsPbBr}_3$  is about 2.3 eV.<sup>1</sup> Thus, the actual band gap of the plates can be best estimated as 2.3 eV +  $\Delta E_g$ .

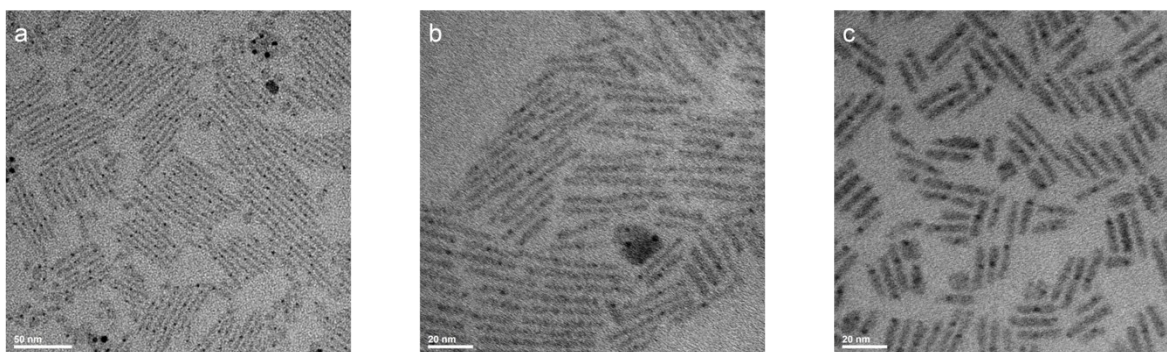

**Figure S3.** TEM images of (a) 4 unit cell, (b) 5 unit cell and (c) 6 unit cell thick  $\text{CsPbBr}_3$  NPLs.

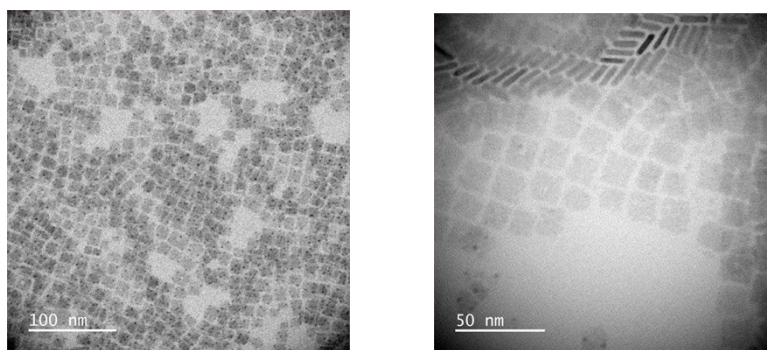

**Figure S4.** TEM images of 6 unit cell thick  $\text{CsPbBr}_3$  NPLs.

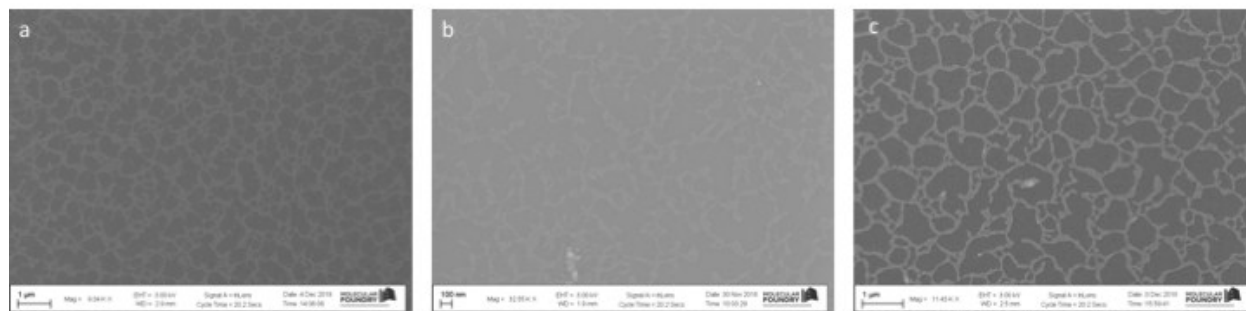

**Figure S5.** SEM images of (a) 2 unit cell, (b) 4 unit cell and (c) 6 unit cell thick CsPbBr<sub>3</sub> NPLs.

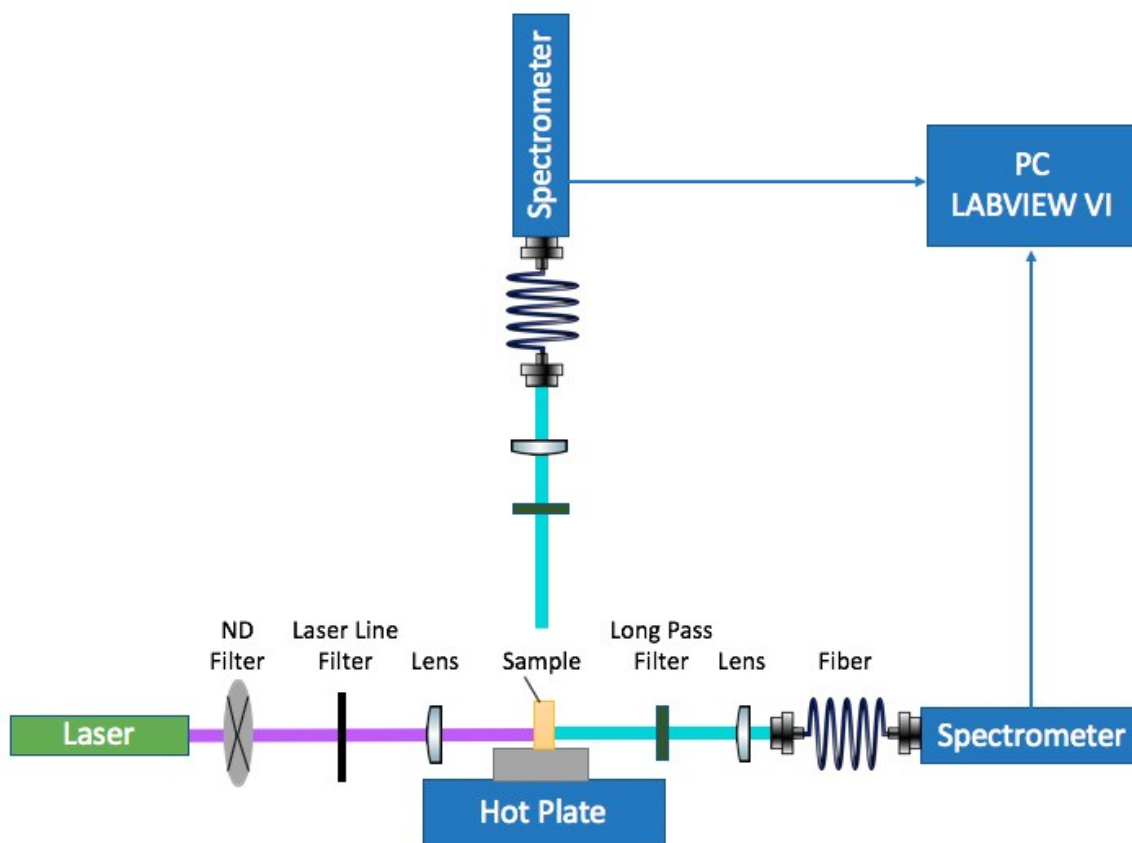

**Figure S6.** Schematic of the horizontal and vertical *in situ* photoluminescence setup.

## Electronic Supporting Information

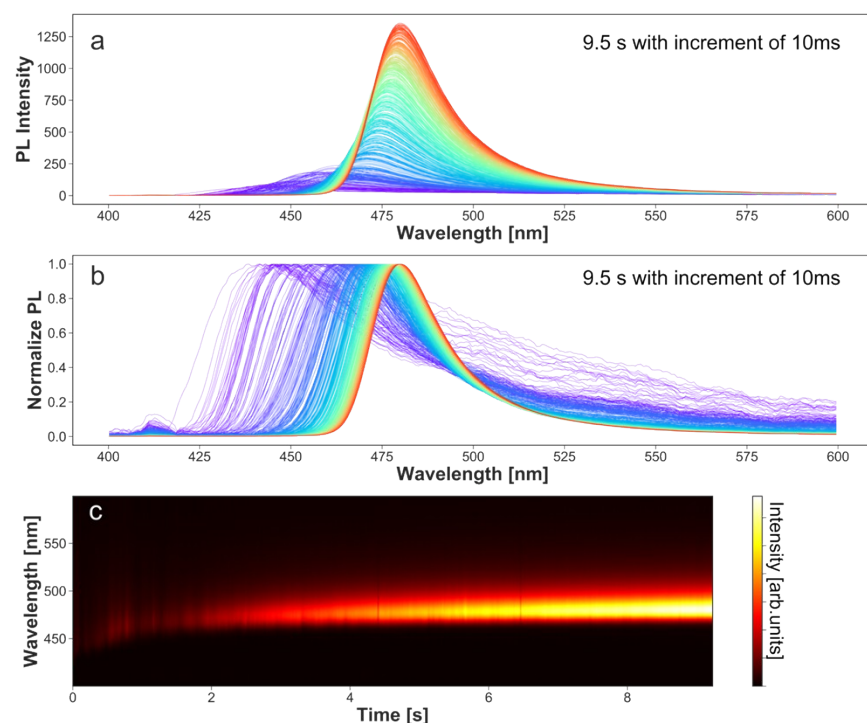

**Figure S7.** PL emission intensity (a), normalized PL spectra (b) and heat map (c) of a reaction at 60 °C for an OA:OLAm ratio of 1:3.

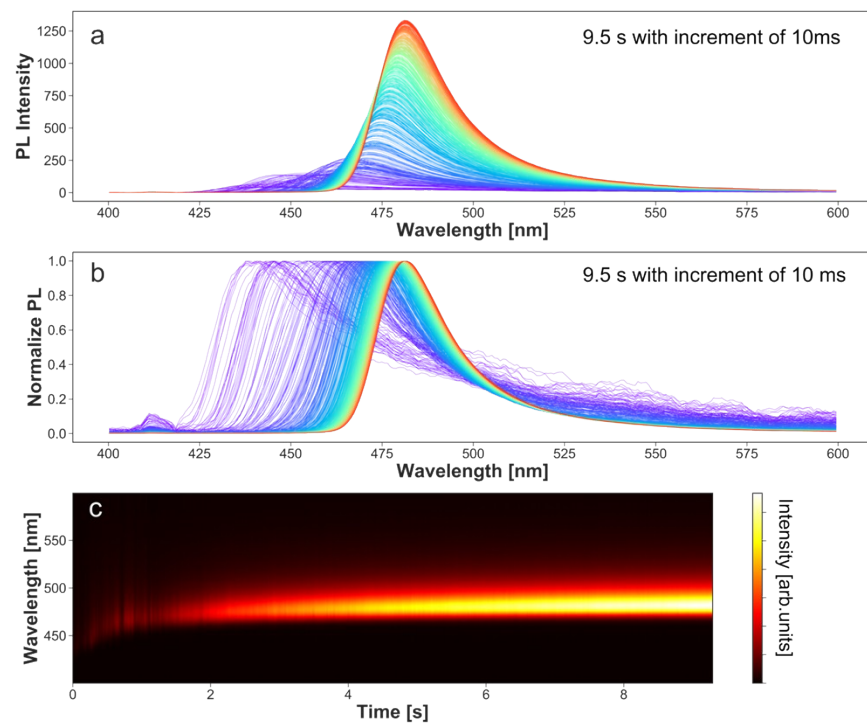

**Figure S8.** PL emission intensity (a), normalized PL spectra (b) and heat map (c) of a reaction at 70 °C for an OA:OLAm ratio of 1:3.

## Electronic Supporting Information

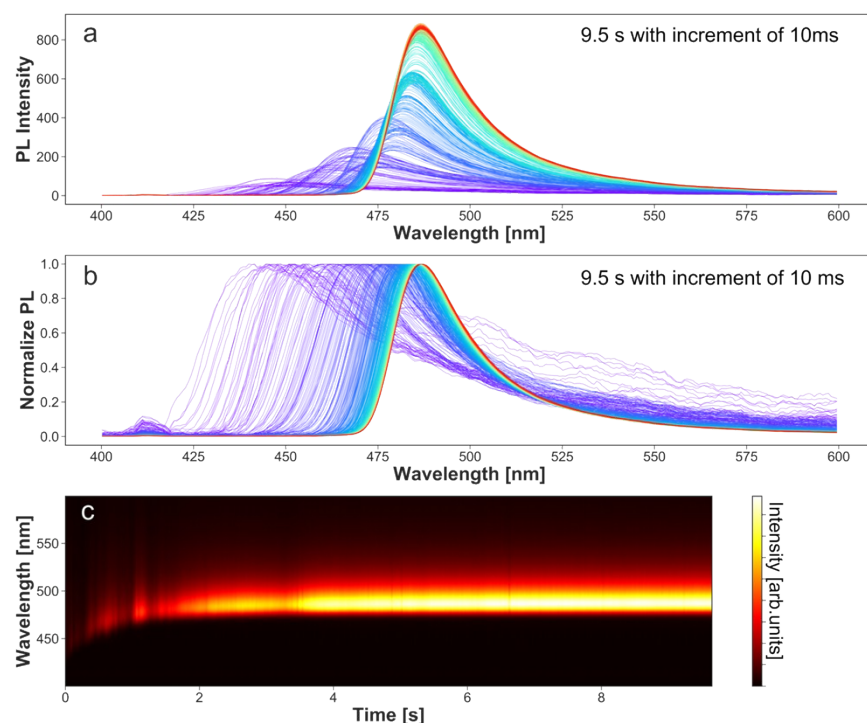

**Figure S9.** PL emission intensity (a), normalized PL spectra (b) and heat map (c) of a reaction at 80 °C for an OA:OLAm ratio of 1:3.

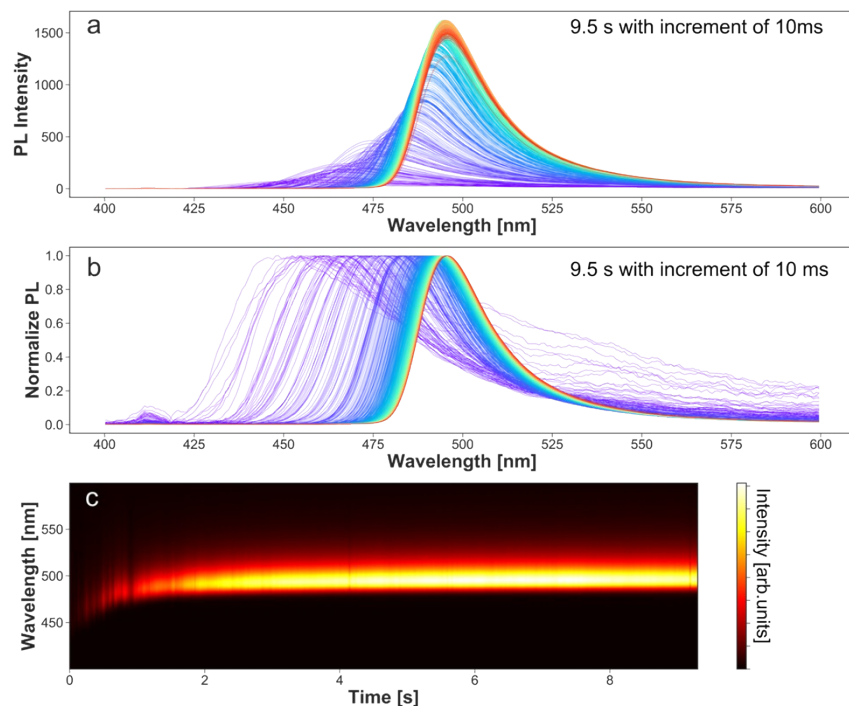

**Figure S10.** PL emission intensity (a), normalized PL spectra (b) and heat map (c) of a reaction at 90 °C for an OA:OLAm ratio of 1:3.



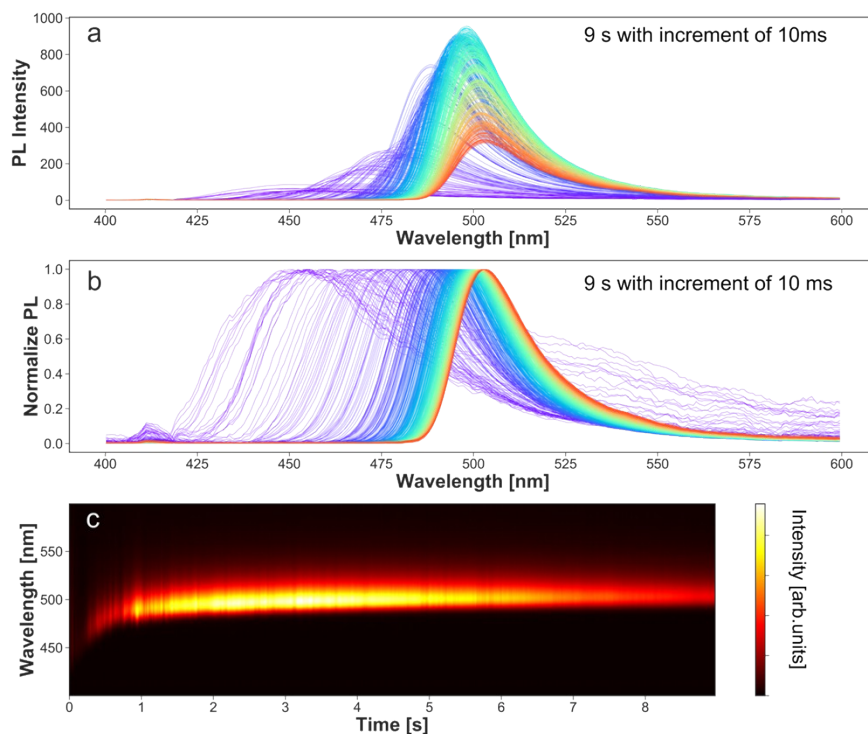

**Figure S11.** PL emission intensity (a), normalized PL spectra (b) and heat map (c) of a reaction at 100 °C for an OA:OLAm ratio of 1:3.

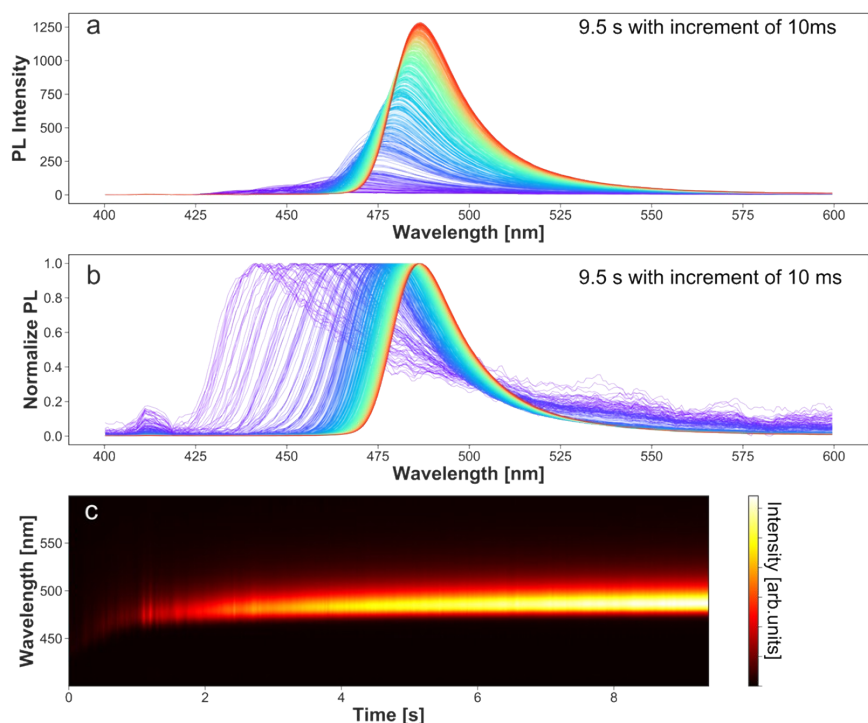

**Figure S12.** PL emission intensity (a), normalized PL spectra (b) and heat map (c) of a reaction at 60 °C for an OA:OLAm ratio of 1:2.

## Electronic Supporting Information

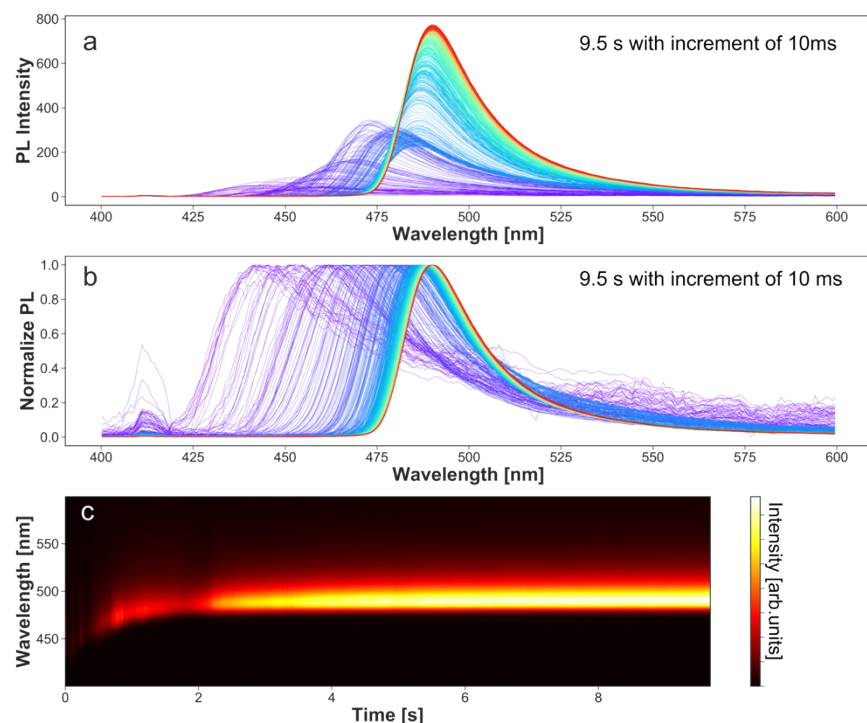

**Figure S13.** PL emission intensity (a), normalized PL spectra (b) and heat map (c) of a reaction at 70 °C for an OA:OLAm ratio of 1:2.

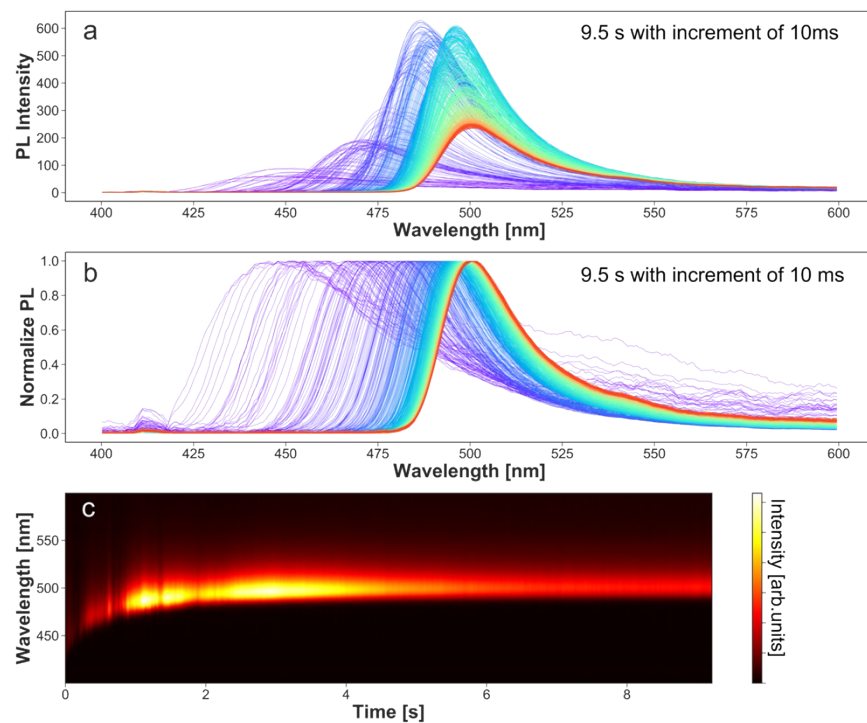

**Figure S14.** PL emission intensity (a), normalized PL spectra (b) and heat map (c) of a reaction at 80 °C for an OA:OLAm ratio of 1:2.



## Electronic Supporting Information

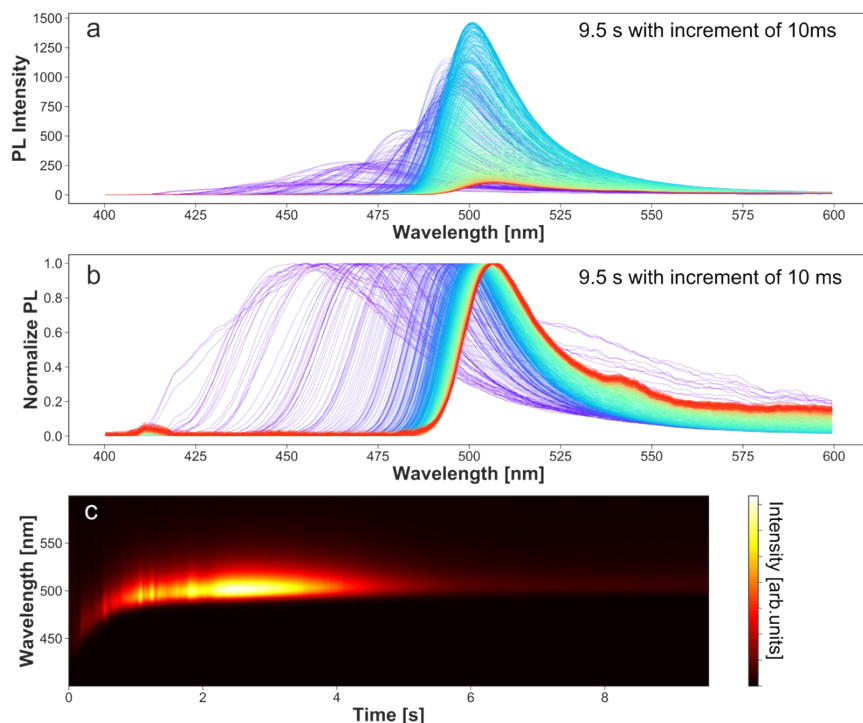

**Figure S15.** emission intensity (a), normalized PL spectra (b) and heat map (c) of a reaction at 90 °C for an OA:OLAm ratio of 1:2.

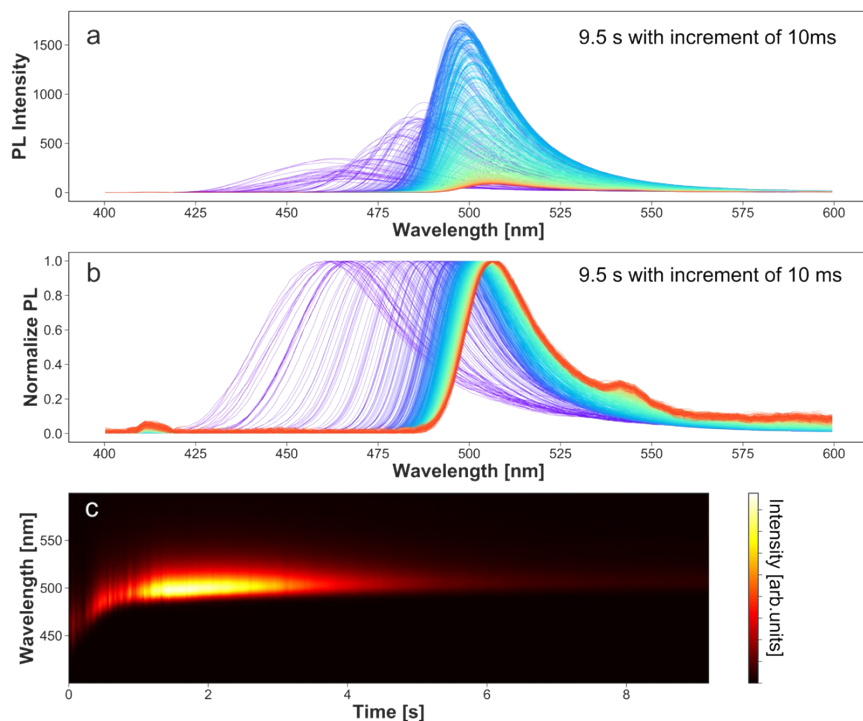

**Figure S16.** PL emission intensity (a), normalized PL spectra (b) and heat map (c) of a reaction at 100 °C for an OA:OLAm ratio of 1:2.

## Electronic Supporting Information

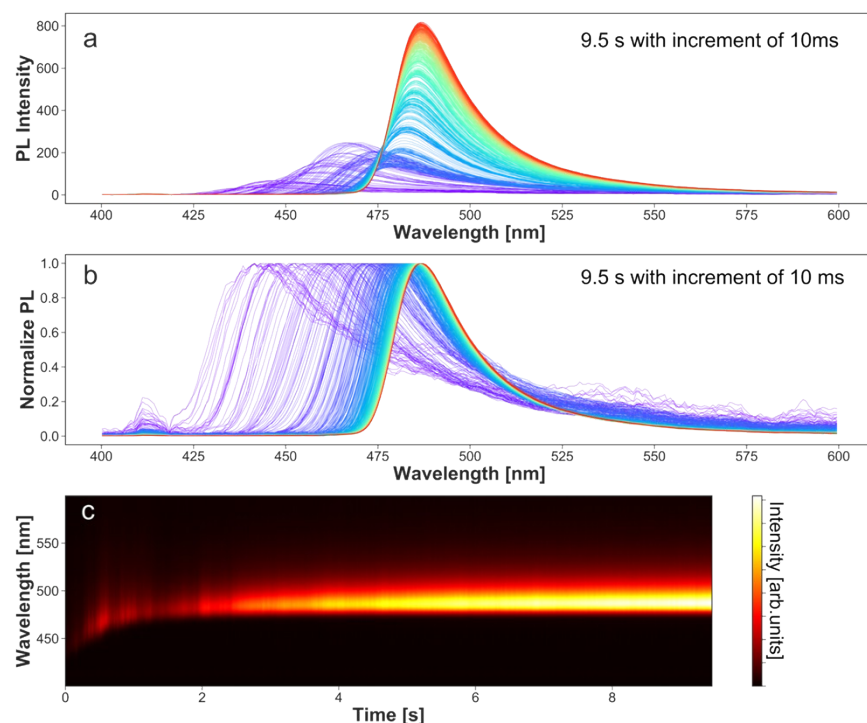

**Figure S17.** PL emission intensity (a), normalized PL spectra (b) and heat map (c) of a reaction at 60 °C for an OA:OLAm ratio of 1:1.

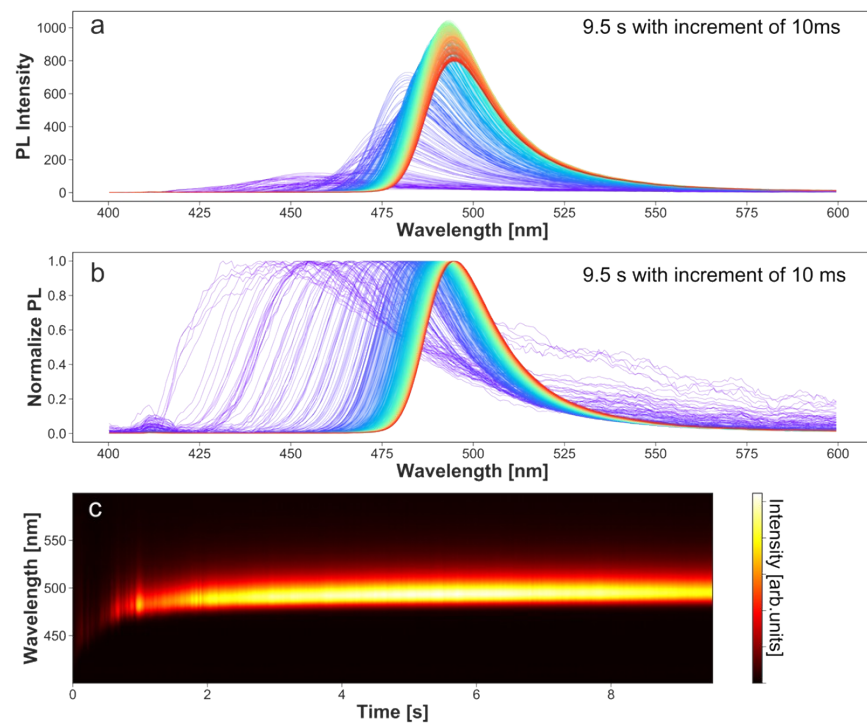

**Figure S18.** PL emission intensity (a), normalized PL spectra (b) and heat map (c) of a reaction at 70 °C for an OA:OLAm ratio of 1:1.

## Electronic Supporting Information

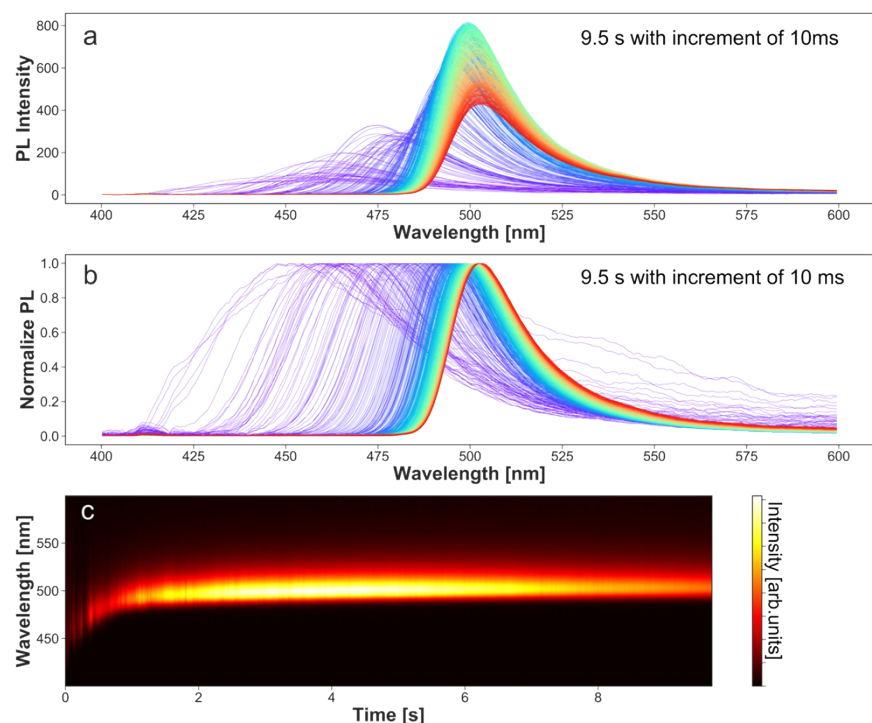

**Figure S19.** PL emission intensity (a), normalized PL spectra (b) and heat map (c) of a reaction at 80 °C for an OA:OLAm ratio of 1:1.

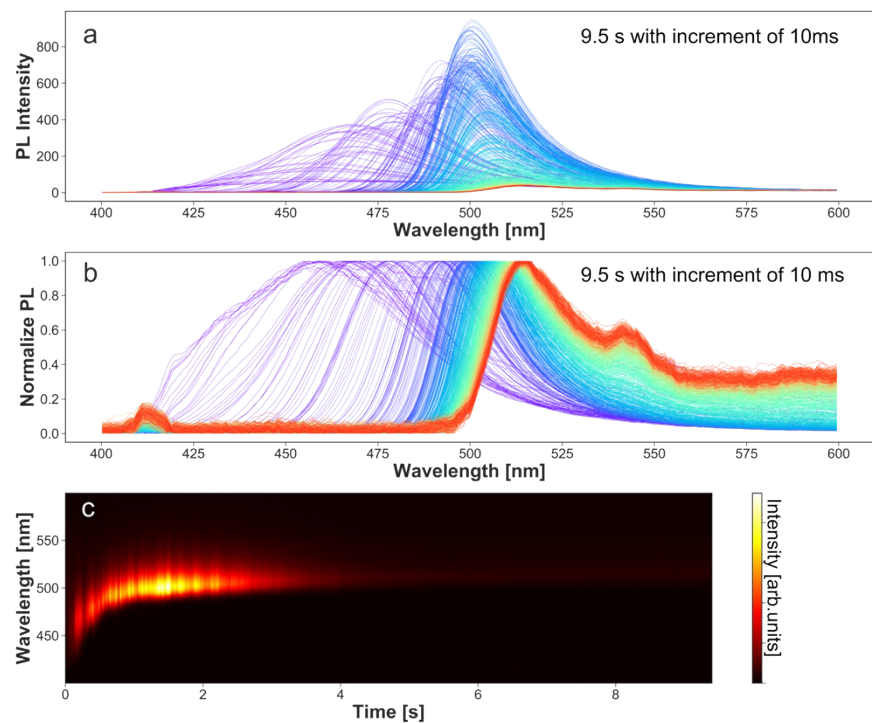

**Figure S20.** PL emission intensity (a), normalized PL spectra (b) and heat map (c) of a reaction at 90 °C for an OA:OLAm ratio of 1:1.

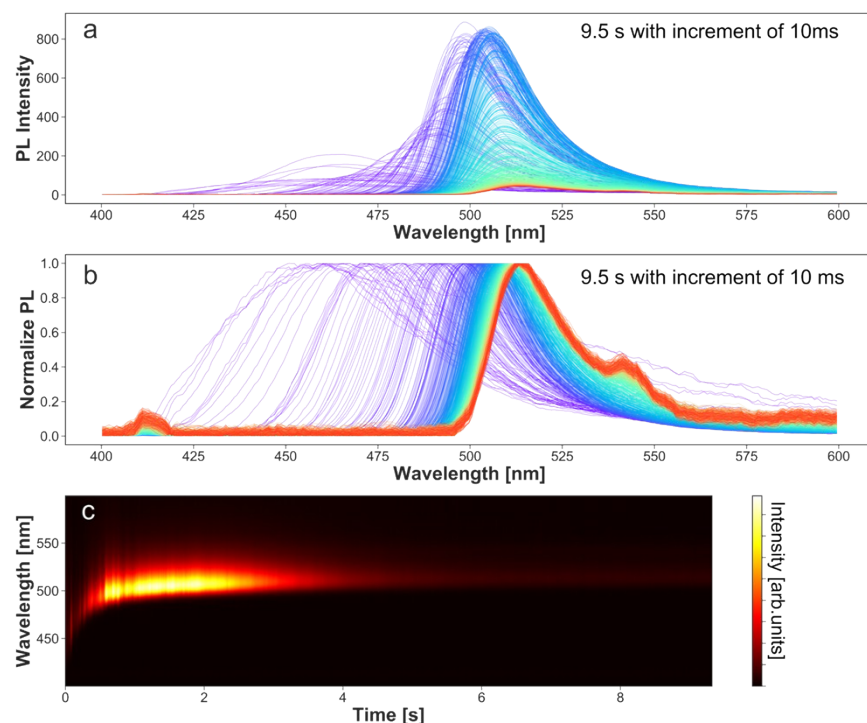

**Figure S21.** PL emission intensity (a), normalized PL spectra (b) and heat map (c) of a reaction at 100 °C for an OA:OLAm ratio of 1:1.

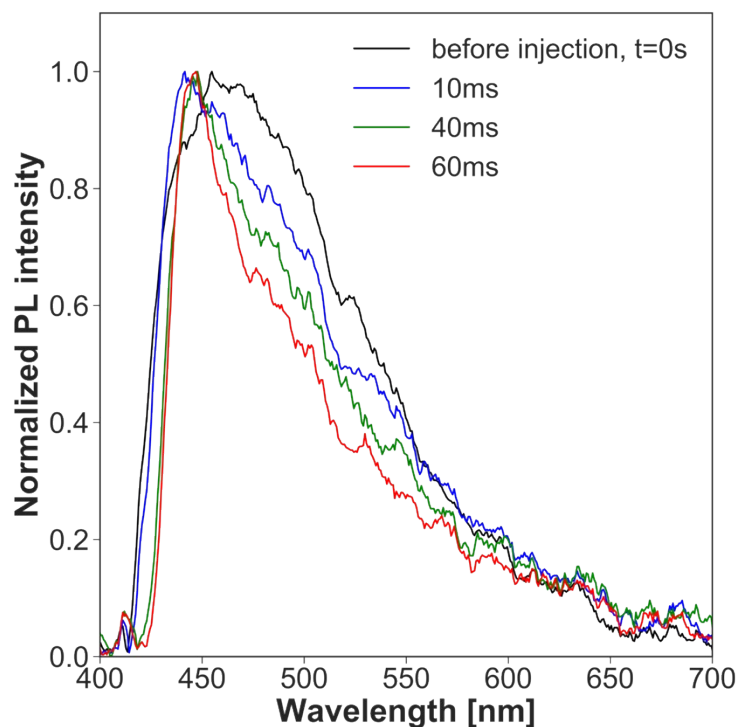

**Figure S22.** Normalized PL spectra before injection of benzoyl bromide and evolution of PL spectra after injection of benzoyl bromide. Sample from OA:OLAm of 1:3 at 80°C

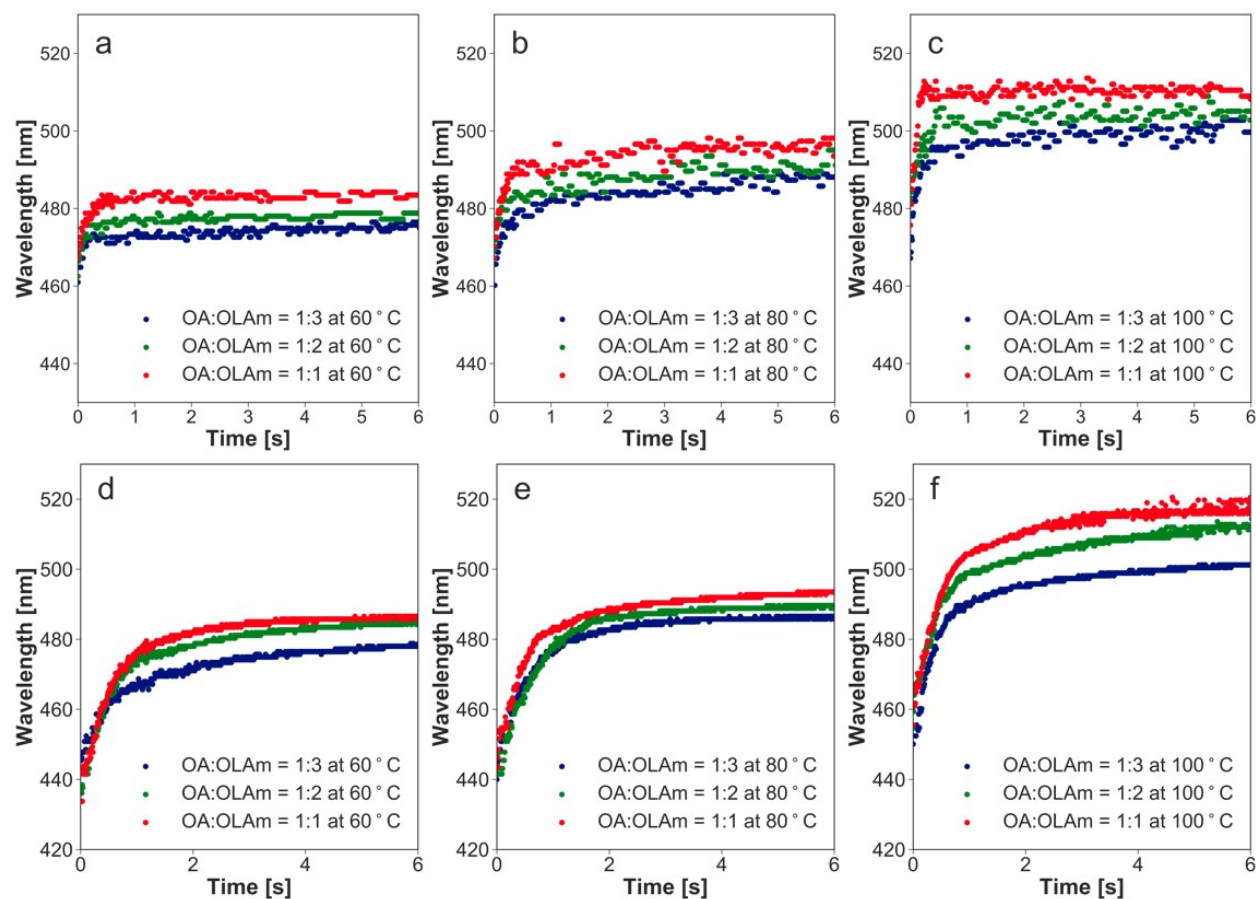

**Figure S23:** PL emission wavelength of the vertical set up (a,b,c) and horizontal set up (d, e, f).

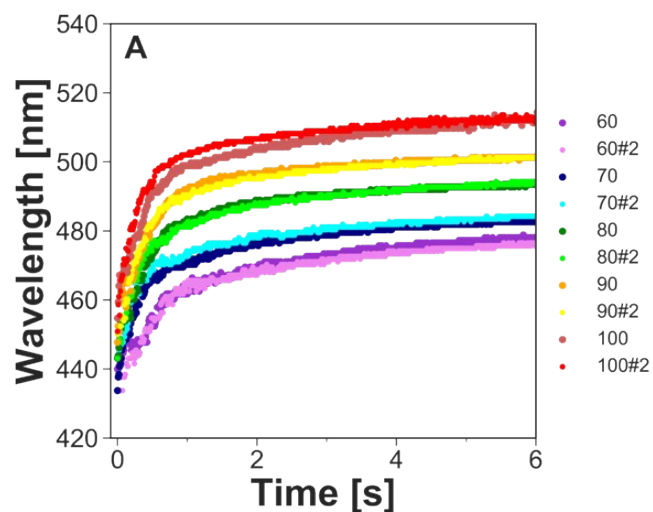

**Figure S24:** PL emission wavelength versus time reproduced for multiple individual reactions under the same synthetic conditions.

Reference:

1. Liang, J.; Wang, C.; Wang, Y.; Xu, Z.; Lu, Z.; Ma, Y.; Zhu, H.; Hu, Y.; Xiao, C.; Yi, X.; Zhu, G.; Lv, H.; Ma, L.; Chen, T.; Tie, Z.; Jin, Z.; Liu, J., All-Inorganic Perovskite Solar Cells. *J. Am. Chem. Soc.* **2016**, *138* (49), 15829-15832.
